# Supplementary material for: Aqueous-phase detection of antibiotics and nitroaromatic explosives by an alkali-resistant Zn-MOF directed by an ionic liquid
Source: Royal Society of Chemistry journal article supplement (doi:10.1039/c9ra08733h), 2020-01-01
Supplement: c9ra08733h1.pdf [file c9ra08733h1.pdf]

## **Aqueous-phase detection of antibiotics and nitroaromatic explosives by an alkali-resistant Zn-MOF directed by an ionic liquid**

Jian-Hua Qin,<sup>a</sup> Ya-Dan Huang,<sup>a,b</sup> Ming-Yu Shi,<sup>a</sup> Hua-Rui Wang,<sup>\*a</sup> Min-Le Han,<sup>a</sup> Xiao-Gang Yang,<sup>\*a</sup> Fei-Fei Li,<sup>b</sup>  
and Lu-Fang Ma<sup>a,c</sup>

<sup>a</sup>*College of Chemistry and Chemical Engineering, and Henan Key Laboratory of Function-Oriented Porous Materials, Luoyang Normal University, Luoyang 471934, China, E-mail: yxg2233@126.com.*

<sup>b</sup>*College of Chemistry and Chemical Engineering, Henan Polytechnic University, Jiaozuo, 454000, PR. China.*

<sup>c</sup>*College of Chemistry and Molecular Engineering, Zhengzhou University, Zhengzhou, 450001, PR. China.*

## Supporting Information

**Fig. S1** Schematic representation of the 4,8-connected topology ( $\text{CaF}_2$ ).

**Fig. S2** PXRD patterns for simulated and experimental **1** sample soaked in aqueous solutions over the pH range from 2 to 6.

**Fig. S3** Thermogravimetric curve of **1**.

**Fig. S4** Normalized excitation and emission spectra of  $\text{H}_4\text{ptptc}$  in solid state at room temperature.

**Fig. S5** Fluorescence spectra (a) and decay curve (b) of **1**.

**Fig. S6** Phosphorescence spectra (a) and decay curve (b) of **1**.

**Fig. S7** The emission spectra for **1** dispersed in different solvents at room temperature.

**Fig. S8-S20** Details of detecting of antibiotics of **1** in the aqueous phase.

**Fig. S21-S29** Details of detecting of nitroaromatic explosives of **1** in the aqueous phase.

**Fig. S30** Spectral overlap between normalized absorption spectra of selected antibiotics and the normalized emission spectra of **1** in water.

**Fig. S31** Spectral overlap between normalized absorption spectra of selected nitroaromatic explosives and the normalized emission spectra of **1** in water.

**Table S1.** Crystallographic data and experimental details for **1**.

**Table S2.** Selected bond lengths ( $\text{\AA}$ ) and angles ( $^\circ$ ) for **1**.

**Table S3.** Summary of quenching constants ( $K_{sv}$ ) of **1** for sensing different analytes at room temperature.

**Table S4.** HOMO and LUMO energies calculated for the analytes used at B3LYP/6-31G\*\* level.

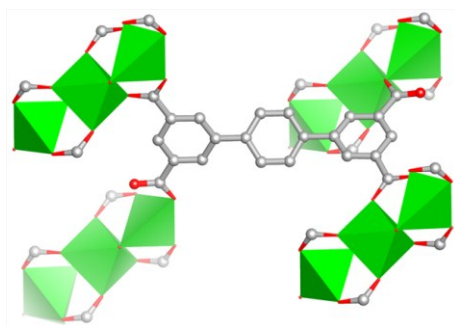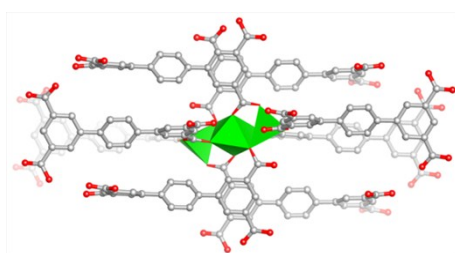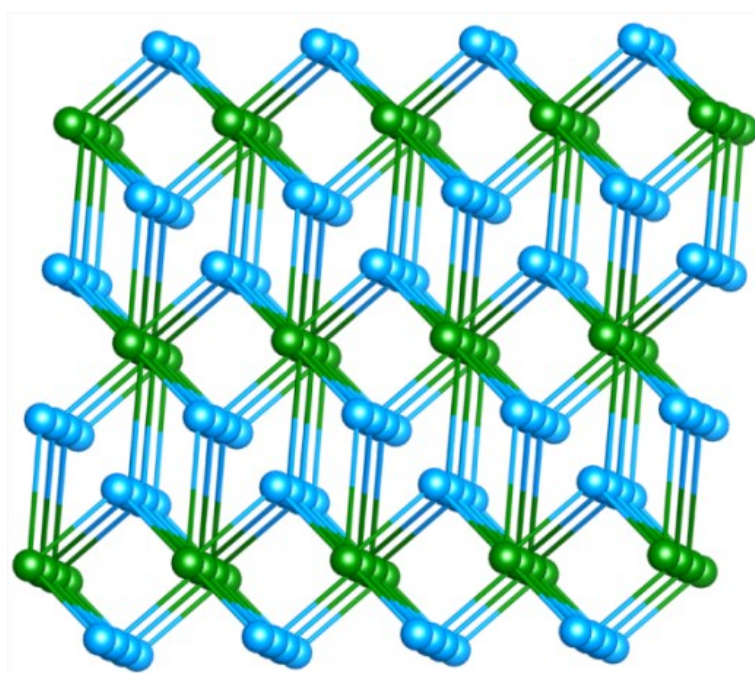

**Fig. S1** Schematic representation of the 4,8-connected topology ( $\text{CaF}_2$ ) (blue nodes for ptpc ligands and green nodes for  $[\text{Zn}_3(\text{CO}_2)_8]$  clusters).

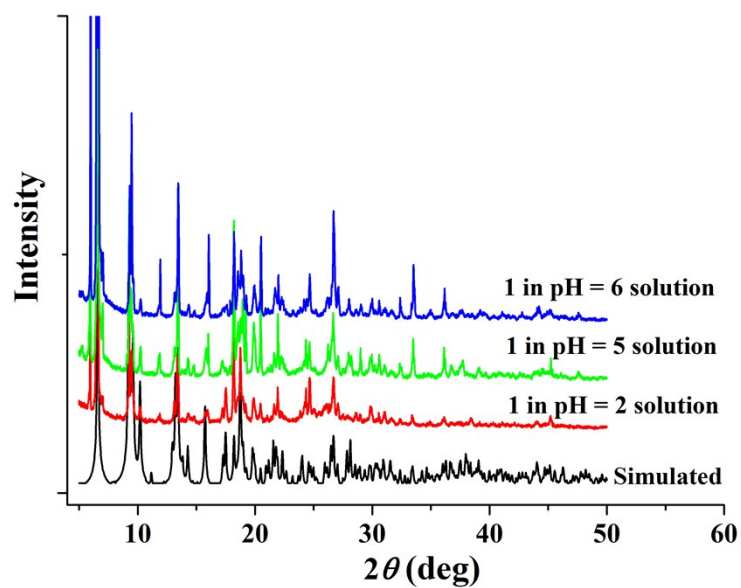

**Fig. S2** PXRD patterns for simulated and experimental **1** sample soaked in aqueous solutions over the pH range from 2 to 6.

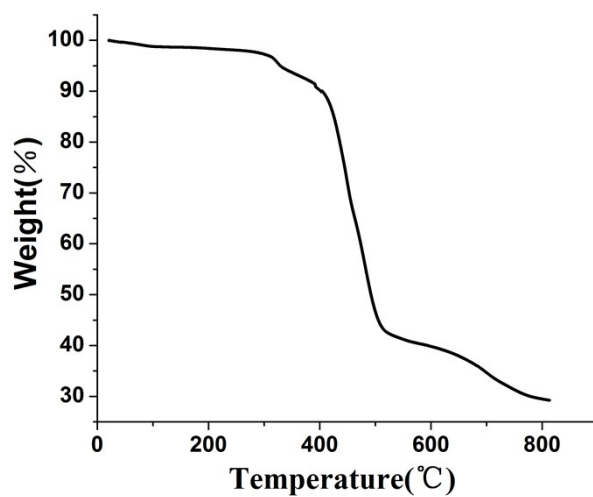

**Fig. S3** Thermogravimetric curve of **1**.

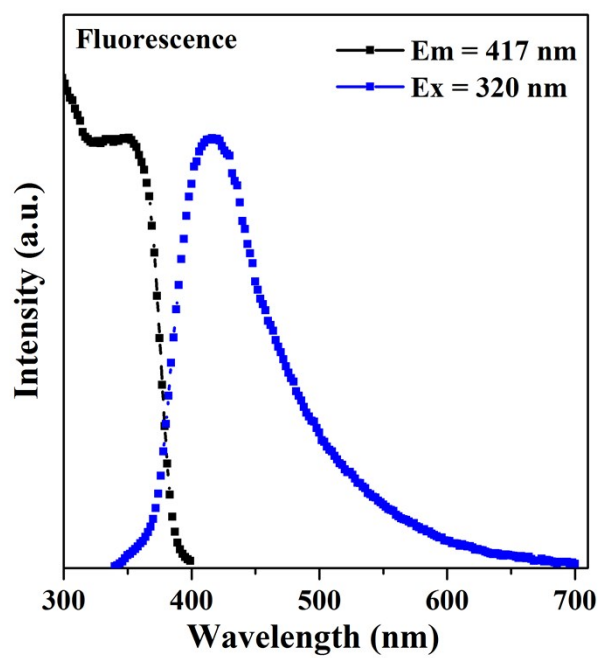

**Fig. S4** Normalized excitation and emission spectra of H<sub>4</sub>ptpc in solid state at room temperature.

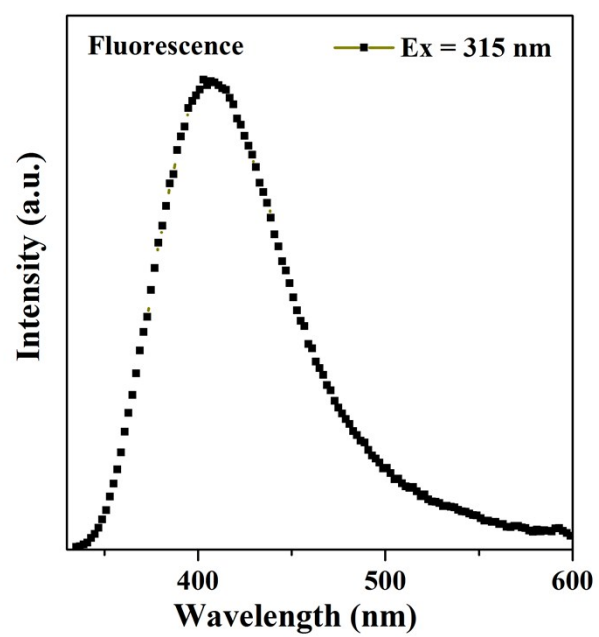

(a)

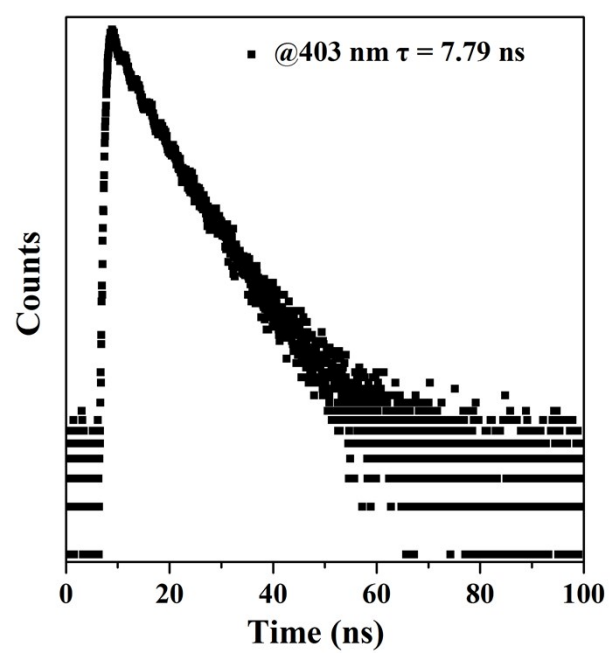

(b)

Fig. S5 Fluorescence spectra (a) and decay curve (b) of **1**.

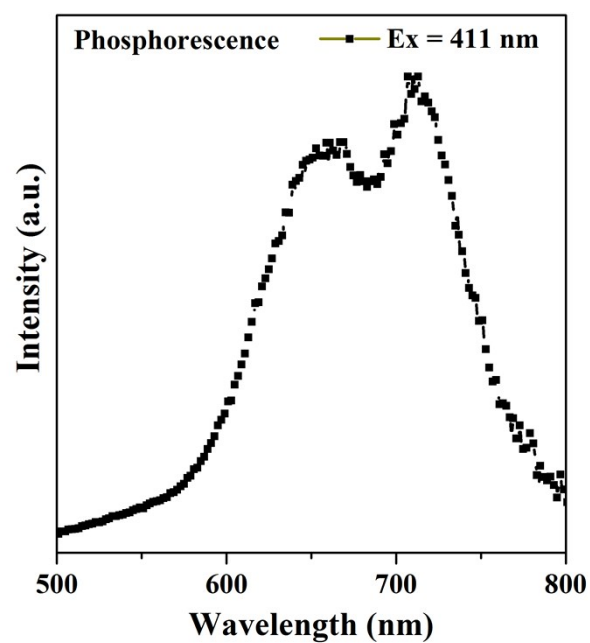

(a)

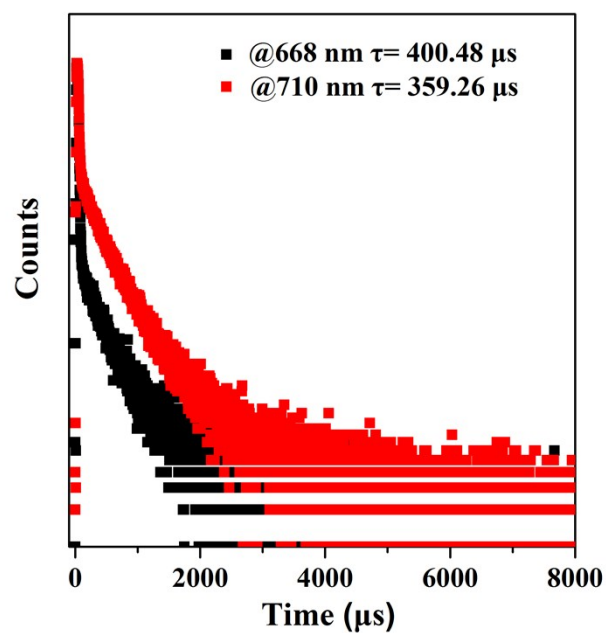

(b)

Fig. S6 Phosphorescence spectra (a) and decay curve (b) of **1**.

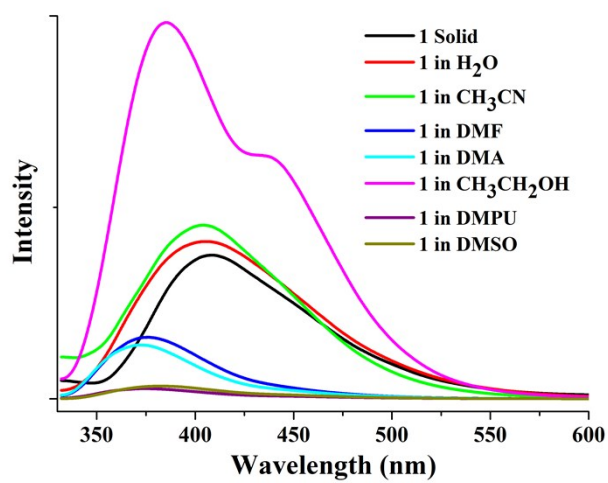

**Fig. S7** The emission spectra for **1** dispersed in different solvents at room temperature.

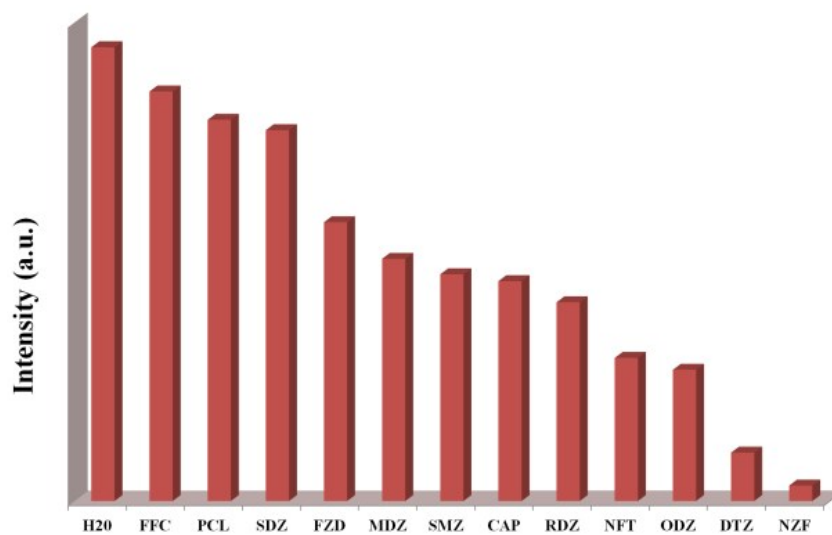

**Fig. S8** The fluorescent intensity for **1** dispersed in 0.1 mM aqueous solutions of the selected antibiotics at room temperature.



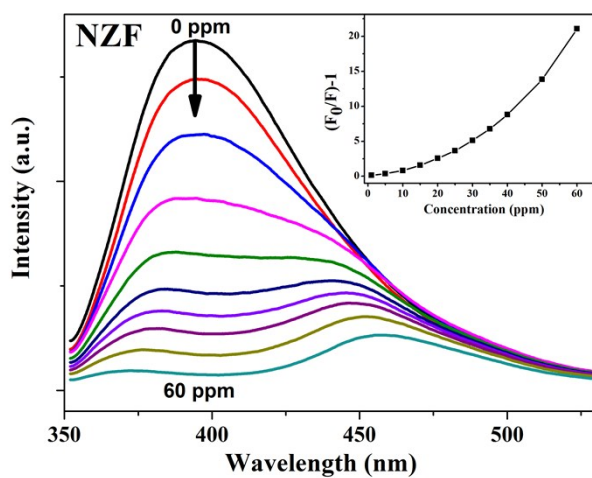

**Fig. S9** Effect on the emission spectra of **1** dispersed in water upon incremental addition of NZF (inset: SV plots of NZF).

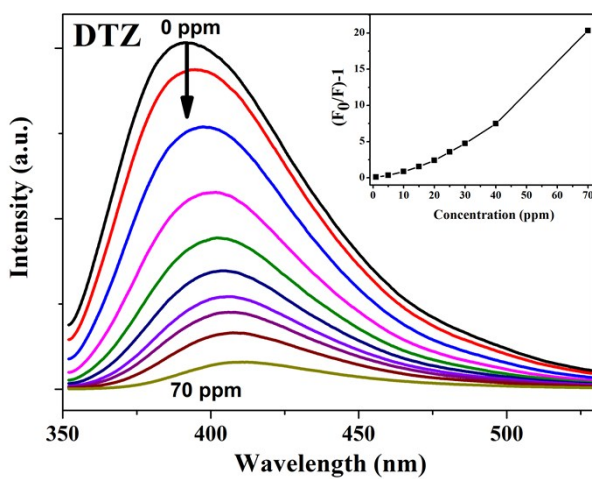

**Fig. S10** Effect on the emission spectra of **1** dispersed in water upon incremental addition of DTZ (inset: SV plots of DTZ).

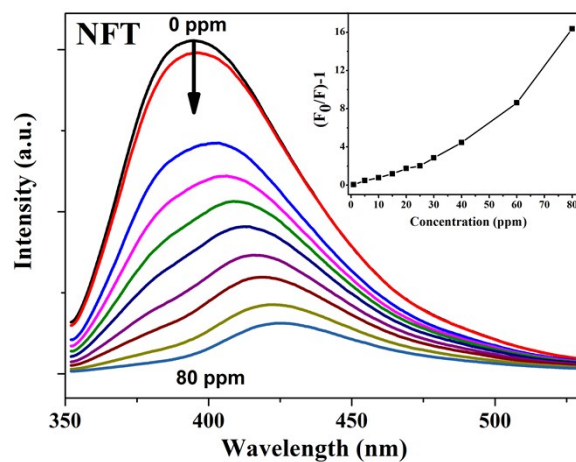

**Fig. S11** Effect on the emission spectra of **1** dispersed in water upon incremental addition of NFT (inset: SV plots of NFT).

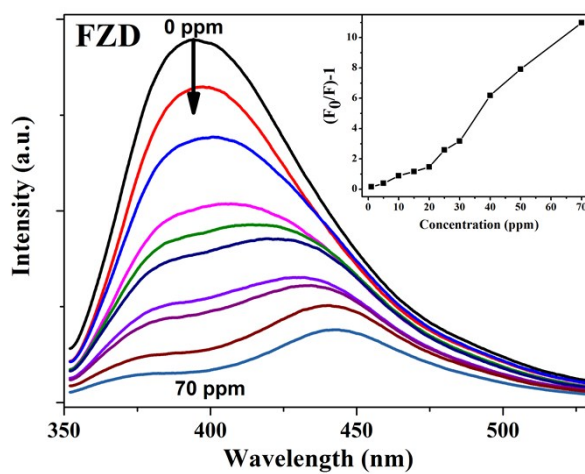

**Fig. S12** Effect on the emission spectra of **1** dispersed in water upon incremental addition of FZD (inset: SV plots of FZD).

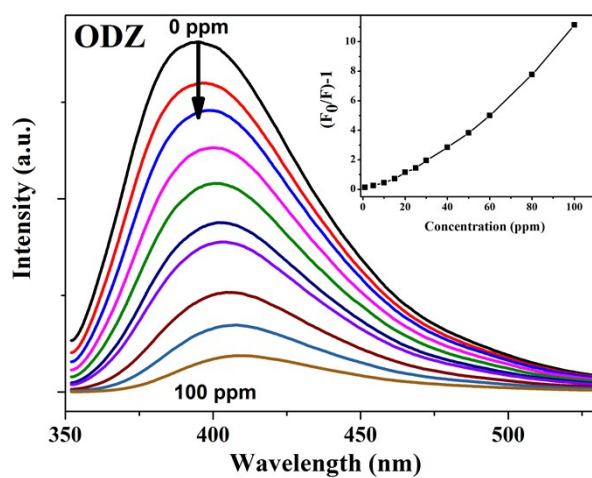

**Fig. S13** Effect on the emission spectra of **1** dispersed in water upon incremental addition of ODZ (inset: SV plots of ODZ).

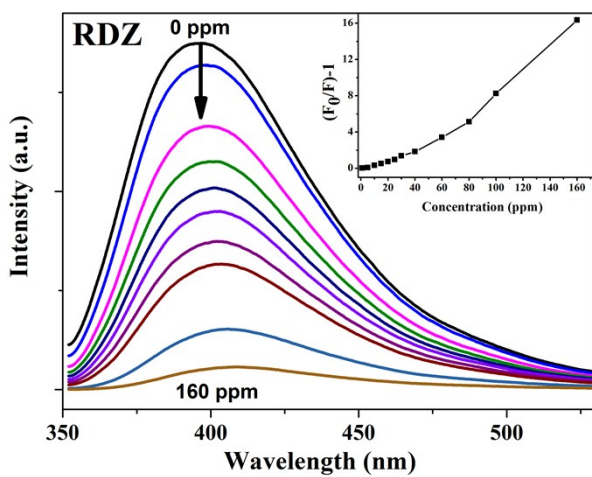

**Fig. S14** Effect on the emission spectra of **1** dispersed in water upon incremental addition of RDZ (inset: SV plots of RDZ).

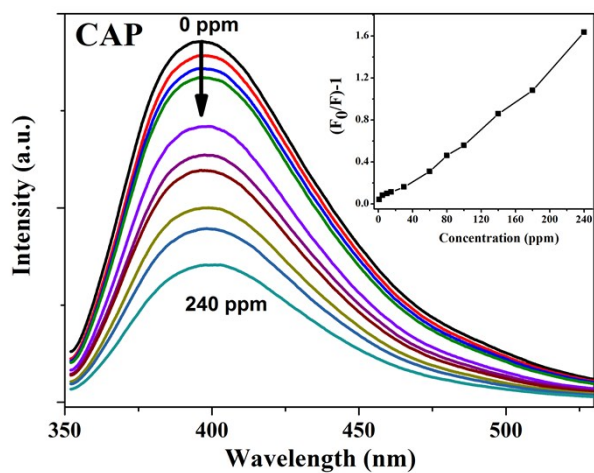

**Fig. S15** Effect on the emission spectra of **1** dispersed in water upon incremental addition of CAP (inset: SV plots of CAP).

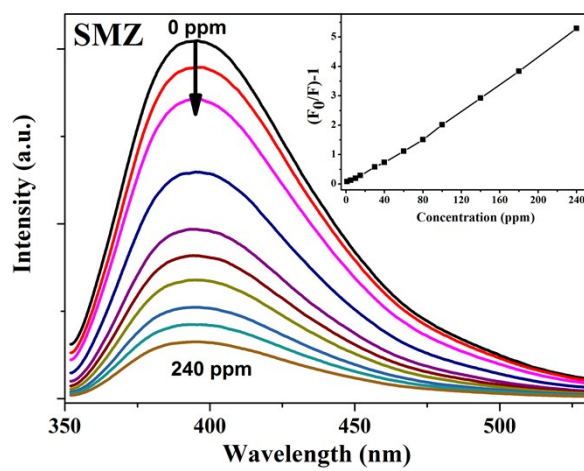

**Fig. S16** Effect on the emission spectra of **1** dispersed in water upon incremental addition of SMZ (inset: SV plots of SMZ).

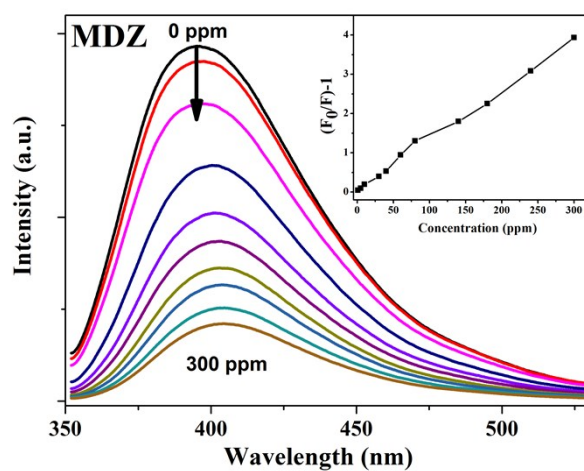

**Fig. S17** Effect on the emission spectra of **1** dispersed in water upon incremental addition of MDZ (inset: SV plots of MDZ).

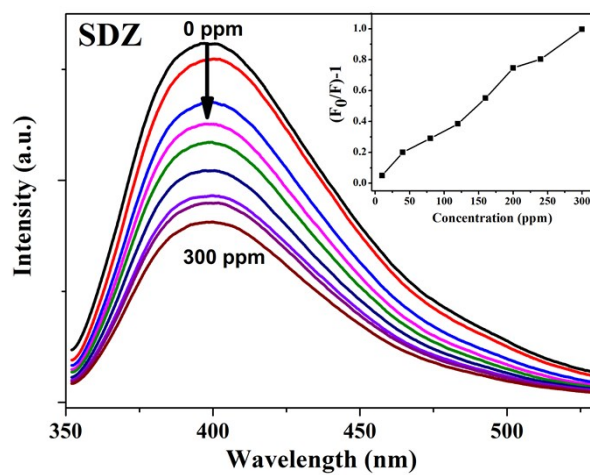

**Fig. S18** Effect on the emission spectra of **1** dispersed in water upon incremental addition of SDZ (inset: SV plots of SDZ).

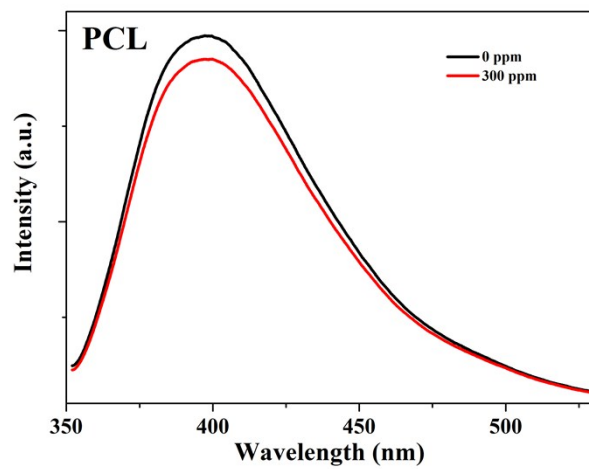

**Fig. S19** Effect on the emission spectra of **1** dispersed in water upon incremental addition of PCL.

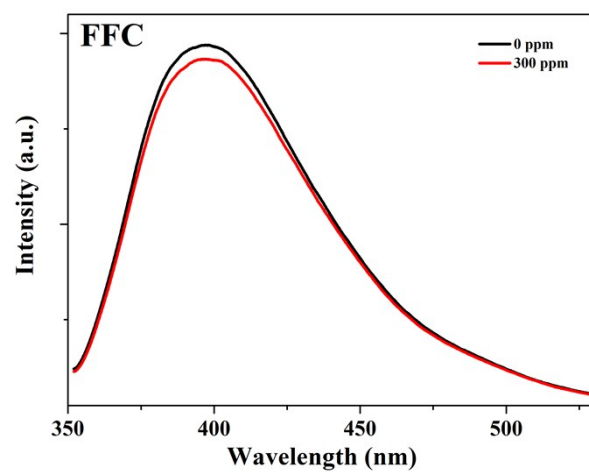

**Fig. S20** Effect on the emission spectra of **1** dispersed in water upon incremental addition of FFC.

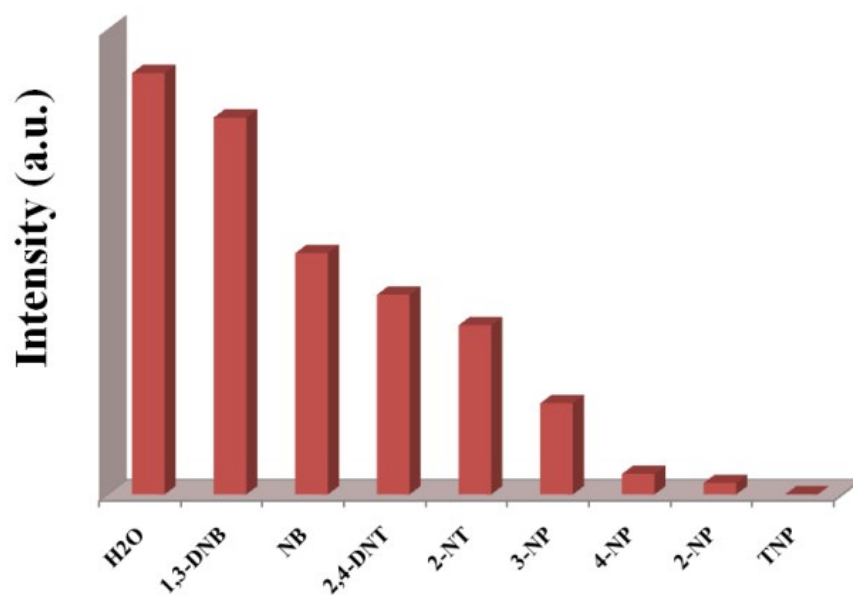

**Fig. S21** The fluorescent intensity for **1** dispersed in 1 mM aqueous solutions of the selected nitroaromatic explosives at room temperature.

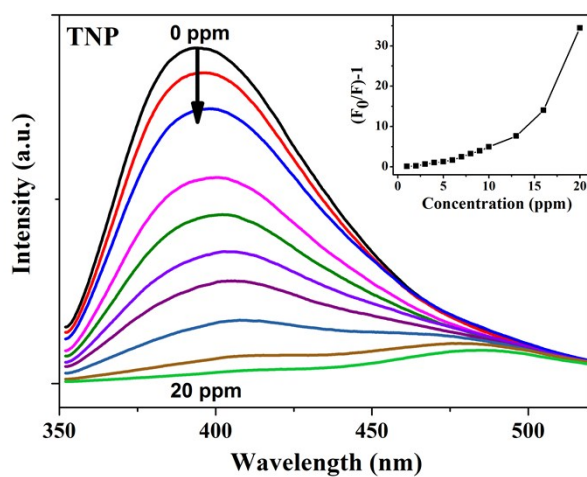

**Fig. S22** Effect on the emission spectra of **1** dispersed in water upon incremental addition of TNP (inset: SV plots of TNP).

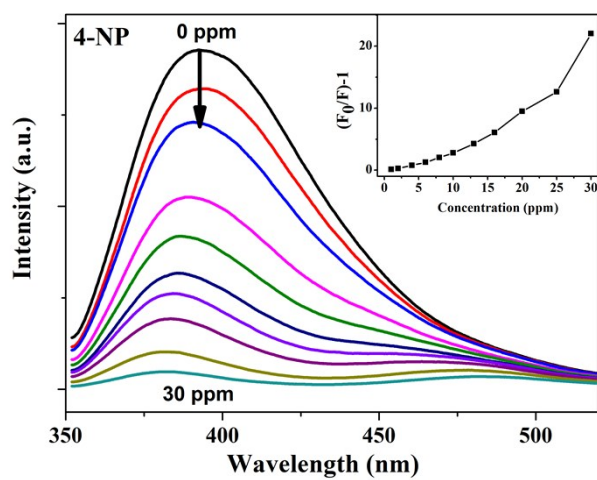

**Fig. S23** Effect on the emission spectra of **1** dispersed in water upon incremental addition of 4-NP (inset: SV plots of 4-NP).

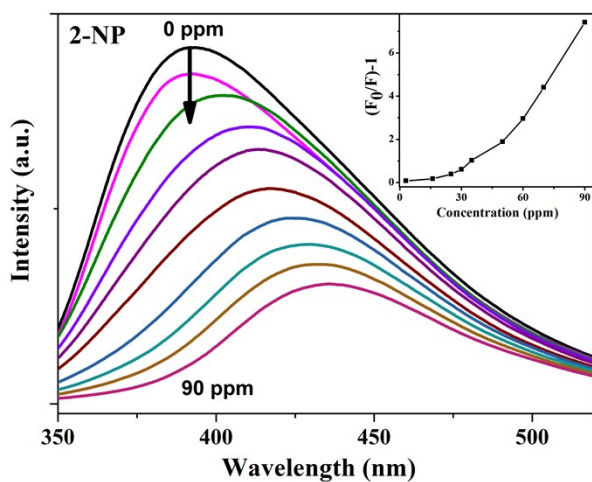

**Fig. S24** Effect on the emission spectra of **1** dispersed in water upon incremental addition of 2-NP (inset: SV plots of 2-NP).



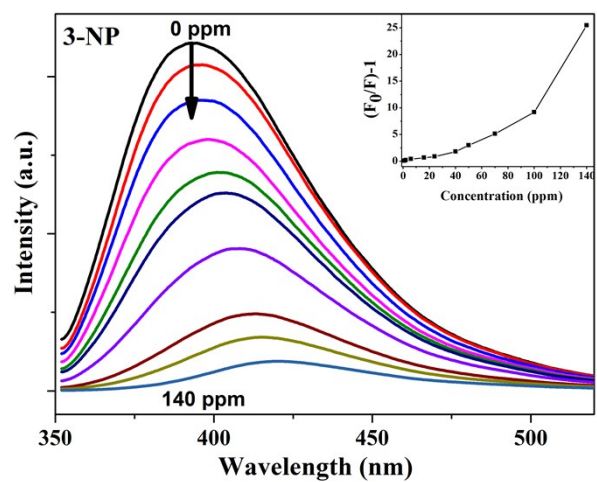

**Fig. S25** Effect on the emission spectra of **1** dispersed in water upon incremental addition of 3-NP (inset: SV plots of 3-NP).

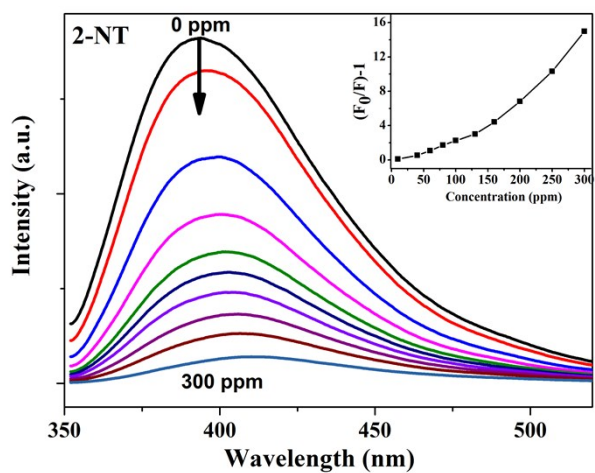

**Fig. S26** Effect on the emission spectra of **1** dispersed in water upon incremental addition of 2-NT (inset: SV plots of 2-NT).

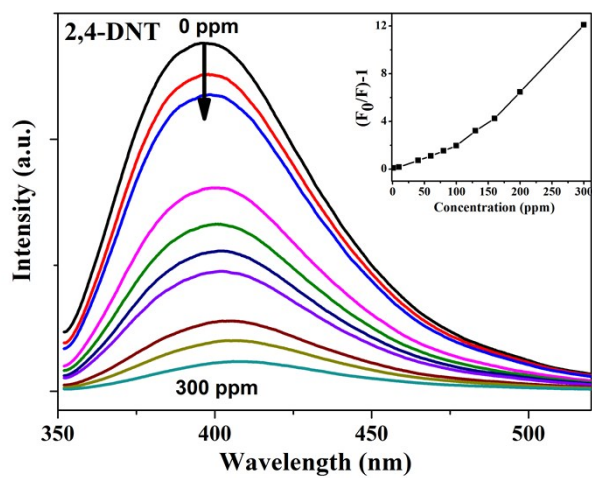

**Fig. S27** Effect on the emission spectra of **1** dispersed in water upon incremental addition of 2,4-DNT (inset: SV plots of 2,4-DNT).

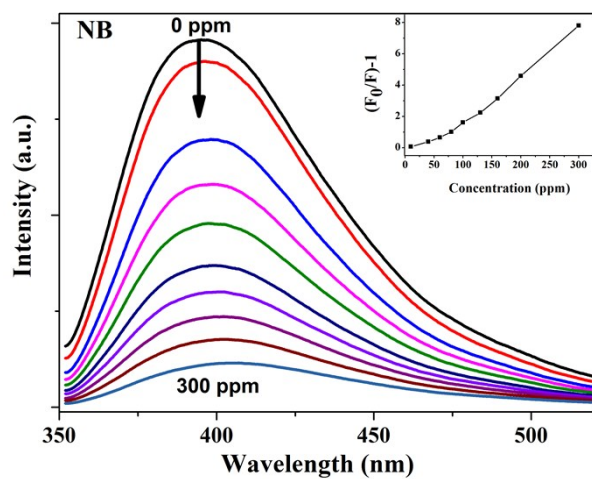

**Fig. S28** Effect on the emission spectra of **1** dispersed in water upon incremental addition of NB (inset: SV plots of NB).

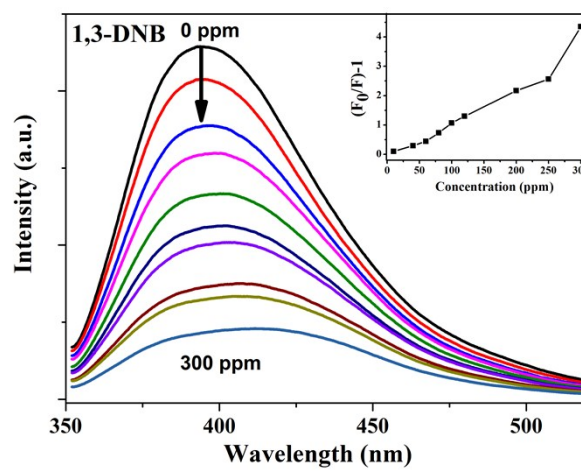

**Fig. S29** Effect on the emission spectra of **1** dispersed in water upon incremental addition of 1,3-DNB (inset: SV plots of 1,3-DNB).

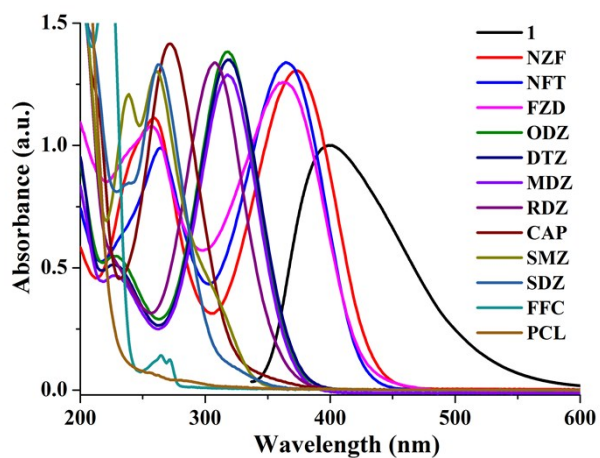

**Fig. S30** Spectral overlap between normalized absorption spectra of selected antibiotics and the normalized emission spectra of **1** in water.

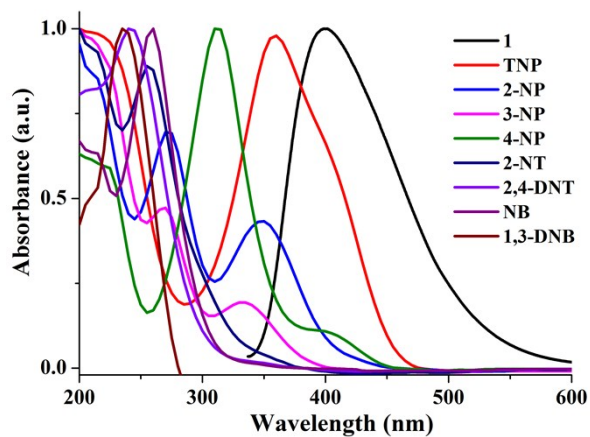

**Fig. S31** Spectral overlap between normalized absorption spectra of selected nitroaromatics explosives and the normalized emission spectra of **1** in water.

**Table S1.** Crystallographic data and experimental details for **1**.

| Complex                                     | <b>1</b>                                                                       |
|---------------------------------------------|--------------------------------------------------------------------------------|
| Empirical formula                           | C <sub>60</sub> H <sub>50</sub> N <sub>4</sub> O <sub>16</sub> Zn <sub>3</sub> |
| Formula weight                              | 1279                                                                           |
| Temperature/K                               | 293(2)                                                                         |
| Crystal system                              | triclinic                                                                      |
| Space group                                 | P-1                                                                            |
| a/Å                                         | 9.6166(4)                                                                      |
| b/Å                                         | 14.4465(6)                                                                     |
| c/Å                                         | 20.4967(10)                                                                    |
| α/°                                         | 106.767(4)                                                                     |
| β/°                                         | 98.427(4)                                                                      |
| γ/°                                         | 101.203(4)                                                                     |
| Volume/Å <sup>3</sup>                       | 2611.6(2)                                                                      |
| Z                                           | 2                                                                              |
| ρ <sub>calc</sub> /cm <sup>3</sup>          | 1.273                                                                          |
| μ/mm <sup>-1</sup>                          | 1.426                                                                          |
| F(000)                                      | 1004.0                                                                         |
| Crystal size/mm <sup>3</sup>                | 0.27 × 0.24 × 0.21                                                             |
| Radiation                                   | MoKα (λ = 0.71073)                                                             |
| 2θ range for data collection/°              | 6.934 to 50.998                                                                |
| Index ranges                                | -10 ≤ h ≤ 11, -17 ≤ k ≤ 17, -24 ≤ l ≤ 24                                       |
| Reflections collected                       | 19104                                                                          |
| Independent reflections                     | 9346 [R <sub>int</sub> = 0.0352, R <sub>sigma</sub> = 0.0565]                  |
| Data/restraints/parameters                  | 9346/0/604                                                                     |
| Goodness-of-fit on F <sup>2</sup>           | 1.042                                                                          |
| Final R indexes [I > 2σ (I)]                | R <sub>1</sub> = 0.0574, wR <sub>2</sub> = 0.1442                              |
| Final R indexes [all data]                  | R <sub>1</sub> = 0.0690, wR <sub>2</sub> = 0.1519                              |
| Largest diff. peak/hole / e Å <sup>-3</sup> | 1.00/-2.07                                                                     |

$$R = \frac{\sum ||F_o| - |F_c||}{\sum |F_o|}, R_w = \sqrt{\frac{\sum w(|F_o|^2 - |F_c|^2)|^2}{\sum w(|F_o|^2)}}^{1/2}$$

**Table S2.** Selected bond lengths (Å) and angles (°) for **1**.

| Atom | Atom             | Length/Å | Atom | Atom             | Length/Å |
|------|------------------|----------|------|------------------|----------|
| Zn1  | O1               | 1.964(3) | Zn2  | O9 <sup>5</sup>  | 2.021(3) |
| Zn1  | O4 <sup>1</sup>  | 2.183(3) | Zn2  | O12 <sup>6</sup> | 2.031(3) |
| Zn1  | O7 <sup>2</sup>  | 2.109(3) | Zn2  | O13 <sup>7</sup> | 1.986(3) |
| Zn1  | O10              | 1.977(3) | Zn3  | O2 <sup>4</sup>  | 2.011(3) |
| Zn1  | O12 <sup>3</sup> | 2.271(3) | Zn3  | O4 <sup>8</sup>  | 2.031(3) |
| Zn1  | O14 <sup>4</sup> | 2.095(3) | Zn3  | O8               | 2.000(3) |
| Zn2  | O5               | 1.976(3) | Zn3  | O16 <sup>9</sup> | 1.989(3) |

| Atom             | Atom | Atom             | Angle/°    | Atom             | Atom | Atom             | Angle/°    |
|------------------|------|------------------|------------|------------------|------|------------------|------------|
| O1               | Zn1  | O4 <sup>1</sup>  | 88.47(12)  | O14 <sup>4</sup> | Zn1  | O12 <sup>3</sup> | 86.99(11)  |
| O1               | Zn1  | O7 <sup>2</sup>  | 95.33(12)  | O5               | Zn2  | O9 <sup>5</sup>  | 101.70(13) |
| O1               | Zn1  | O10              | 177.12(13) | O5               | Zn2  | O12 <sup>6</sup> | 127.70(13) |
| O1               | Zn1  | O12 <sup>3</sup> | 91.47(12)  | O5               | Zn2  | O13 <sup>7</sup> | 104.19(12) |
| O1               | Zn1  | O14 <sup>4</sup> | 84.29(12)  | O9 <sup>5</sup>  | Zn2  | O12 <sup>6</sup> | 111.85(12) |
| O4 <sup>1</sup>  | Zn1  | O12 <sup>3</sup> | 179.41(10) | O13 <sup>7</sup> | Zn2  | O9 <sup>5</sup>  | 105.43(13) |
| O7 <sup>2</sup>  | Zn1  | O4 <sup>1</sup>  | 87.53(11)  | O13 <sup>7</sup> | Zn2  | O12 <sup>6</sup> | 104.03(12) |
| O7 <sup>2</sup>  | Zn1  | O12 <sup>3</sup> | 91.90(10)  | O2 <sup>4</sup>  | Zn3  | O4 <sup>8</sup>  | 110.90(11) |
| O10              | Zn1  | O4 <sup>1</sup>  | 94.20(12)  | O8               | Zn3  | O2 <sup>4</sup>  | 104.90(12) |
| O10              | Zn1  | O7 <sup>2</sup>  | 83.70(12)  | O8               | Zn3  | O4 <sup>8</sup>  | 102.96(12) |
| O10              | Zn1  | O12 <sup>3</sup> | 85.85(12)  | O16 <sup>9</sup> | Zn3  | O2 <sup>4</sup>  | 103.48(13) |
| O10              | Zn1  | O14 <sup>4</sup> | 96.62(12)  | O16 <sup>9</sup> | Zn3  | O4 <sup>8</sup>  | 128.67(13) |
| O14 <sup>4</sup> | Zn1  | O4 <sup>1</sup>  | 93.59(11)  | O16 <sup>9</sup> | Zn3  | O8               | 103.62(12) |
| O14 <sup>4</sup> | Zn1  | O7 <sup>2</sup>  | 178.81(11) |                  |      |                  |            |

<sup>1</sup>1+X,+Y,+Z; <sup>2</sup>1+X,1+Y,+Z; <sup>3</sup>-1+X,+Y,+Z; <sup>4</sup>-1+X,-1+Y,+Z;

<sup>5</sup>-X,1-Y,-Z; <sup>6</sup>1-X,1-Y,-Z; <sup>7</sup>1-X,2-Y,-Z; <sup>8</sup>+X,-1+Y,+Z; <sup>9</sup>1-X,2-Y,1-Z.

**Table S3.** Summary of quenching constants ( $K_{sv}$ ) of **1** for sensing different analytes at room temperature.

| Analytes | $K_{sv}$ (ppm <sup>-1</sup> ) | Analytes | $K_{sv}$ (ppm <sup>-1</sup> ) |
|----------|-------------------------------|----------|-------------------------------|
| NZF      | $1.7 \times 10^{-1}$          | TNP      | $5.3 \times 10^{-1}$          |
| DTZ      | $1.6 \times 10^{-1}$          | 4-NP     | $3.8 \times 10^{-1}$          |
| FZD      | $1.0 \times 10^{-1}$          | 2-NP     | $1.9 \times 10^{-2}$          |
| ODZ      | $6.3 \times 10^{-2}$          | 3-NP     | $3.2 \times 10^{-2}$          |
| NFT      | $9.1 \times 10^{-2}$          | 2-NT     | $2.8 \times 10^{-2}$          |
| RDZ      | $4.6 \times 10^{-2}$          | 2,4-DNT  | $2.5 \times 10^{-2}$          |
| CAP      | $6.4 \times 10^{-3}$          | NB       | $2.1 \times 10^{-2}$          |
| SMZ      | $1.7 \times 10^{-2}$          | 1,3-DNB  | $1.1 \times 10^{-2}$          |
| MDZ      | $1.3 \times 10^{-2}$          |          |                               |
| SDZ      | $3.3 \times 10^{-3}$          |          |                               |

**Table S4.** HOMO and LUMO energies calculated for the analytes used at B3LYP/6-31G\*\* level.

| Analytes             | HOMO (eV) | LUMO (eV) | Band gap |
|----------------------|-----------|-----------|----------|
| PCL <sup>1</sup>     | -5.558    | -1.777    | 3.781    |
| SMZ <sup>2</sup>     | -5.63     | -1.82     | 3.81     |
| SDZ <sup>1</sup>     | -5.538    | -2.26     | 3.278    |
| FFC <sup>2</sup>     | -6.62     | -2.56     | 4.06     |
| ODZ <sup>2</sup>     | -4.97     | -3.02     | 1.95     |
| DTZ <sup>2</sup>     | -6.37     | -3.27     | 3.1      |
| MDZ <sup>2</sup>     | -6.41     | -3.34     | 3.07     |
| CAP <sup>2</sup>     | -6.35     | -3.42     | 2.93     |
| RDZ <sup>2</sup>     | -6.57     | -3.52     | 3.05     |
| NZF <sup>2</sup>     | -5.99     | -3.72     | 2.27     |
| NFT <sup>2</sup>     | -6.21     | -3.94     | 2.27     |
| FZD <sup>2</sup>     | -6.37     | -4.06     | 2.31     |
| NB <sup>2</sup>      | -6.59     | -3.43     | 3.16     |
| 2-NT <sup>2</sup>    | -6.51     | -3.31     | 3.2      |
| 1,3-DNB <sup>3</sup> | -7.9855   | -3.4311   | 4.5544   |
| 2,4-DNT <sup>3</sup> | -7.7645   | -3.2174   | 4.5471   |
| 4-NP <sup>2</sup>    | -6.34     | -3.87     | 2.47     |
| 3-NP <sup>2</sup>    | -6.32     | -3.75     | 2.57     |
| 2-NP <sup>2</sup>    | -6.24     | -3.44     | 2.8      |
| TNP <sup>2</sup>     | -7.39     | -4.97     | 2.42     |

1. B. Wang, X. L. Lv, D. W. Feng, L. H. Xie, J. Zhang, M. Li, Y. B. Xie, J. R. Li and H. C. Zhou, *J. Am. Chem. Soc.*, 2016, **138**, 6204-6216.
2. H. R. Fu, L. B. Yan, N. T. Wu, L. F. Ma and S. Q. Zang, *J. Mater. Chem. A.*, 2018, **6**, 9183-9191.
3. S. S. Nagarkar, B. Joarder, A. K. Chaudhari, S. Mukherjee and S. K. Ghosh, *Angew. Chem. Int. Ed.*, 2013, **52**, 2881-2885.
